# Supplementary material for: Acquisition of radioresistance in docetaxel-resistant human lung adenocarcinoma cells is linked with dysregulation of miR-451/c-Myc-survivin/rad-51 signaling
Source: PubMed Central journal article supplement (PMC4171617; doi:10.18632/oncotarget.2176), 2014-07-07
Supplement: oncotarget-05-6113-s001.pdf [file oncotarget-05-6113-s001.pdf]

**Acquisition of radioresistance in docetaxel-resistant human lung adenocarcinoma cells is linked with dysregulation of miR-451/c-Myc-survivin/rad-51 signaling**

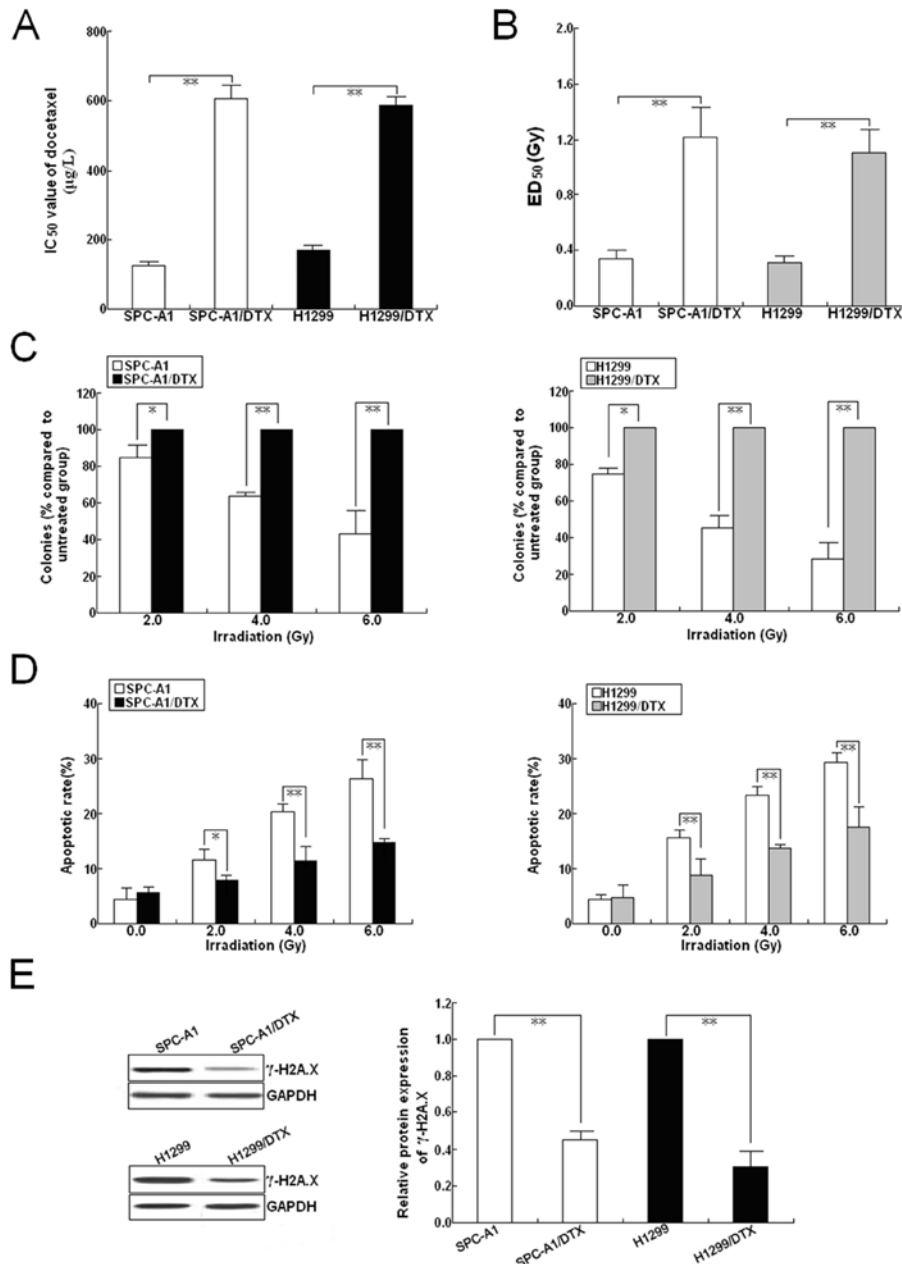

**Supplementary Figure 1: Docetaxel-resistant LAD cells are cross-resistant to irradiation.** (A) MTT assay was conducted to detect the IC<sub>50</sub> values of docetaxel to docetaxel-resistant LAD cells (SPC-A1/DTX and H1299/DTX) and their parental LAD cells (SPC-A1 and H1299), respectively. (B) CCK-8 assay was conducted to detect the ED<sub>50</sub> values of irradiation to docetaxel-resistant LAD cells (SPC-A1/DTX and H1299/DTX) and their parental LAD cells

(SPC-A1 and H1299), respectively. (C) The colony formation of docetaxel-resistant and parental LAD cells treated with various doses of irradiation (2.0, 4.0, and 6.0 Gy). (D) Flow cytometric analysis of apoptosis in docetaxel-resistant and parental LAD cells in the presence of the indicated doses of irradiation (0.0, 2.0, 4.0 and 6.0 Gy). (E) Western blotting detection of  $\gamma$ -H2A.X protein in docetaxel-resistant and parental LAD cells. Results represent the average of three independent experiments (mean $\pm$ SD). \* $P$  < 0.05 and \*\* $P$  < 0.01.

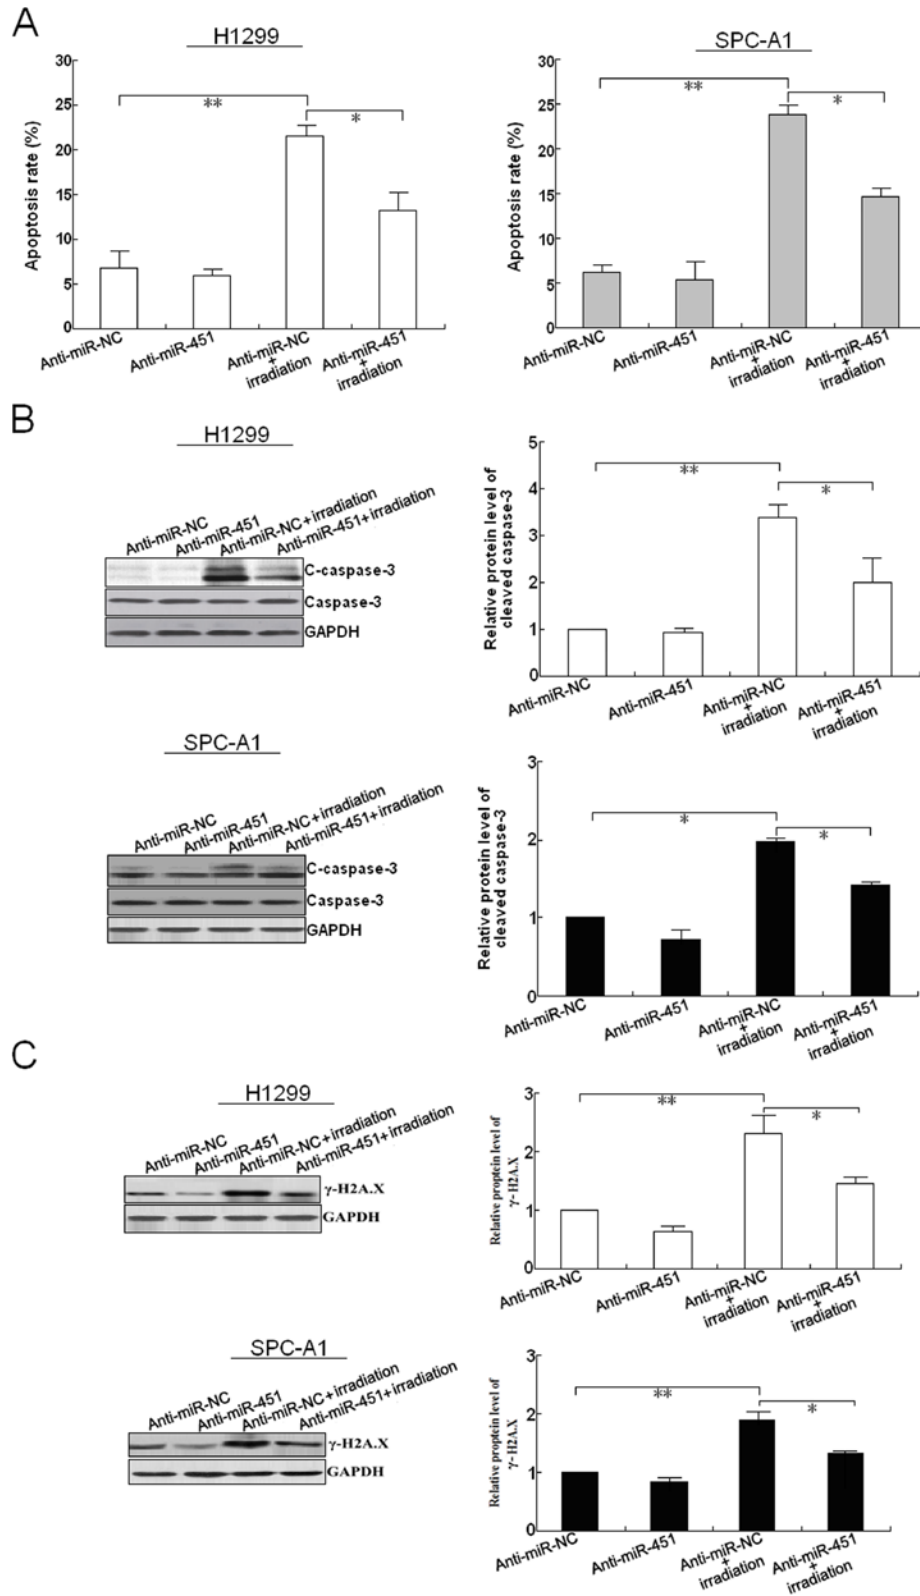

**Supplementary Figure 2: Effect of Anti-miR-451 on radiosensitivity of parental LAD cells.** (A) Flow cytometry detection of apoptosis in Anti-miR-451 (or Anti-miR-NC)-transfected H1299 or SPC-A1 cells combined with irradiation treatment (2.0Gy). (B) Western blotting

detection of C-caspase-3 and Caspase-3 protein expression in Anti-miR-451 (or Anti-miR-NC)-transfected H1299 or SPC-A1 cells combined with irradiation treatment (2.0Gy). GAPDH was used as an internal control. (C) Western blotting detection of  $\gamma$ -H2A.X protein expression in Anti-miR-451 (or Anti-miR-NC)-transfected H1299 or SPC-A1 cells combined with irradiation treatment (2.0Gy). GAPDH was used as an internal control. Results represent the average of three independent experiments (mean  $\pm$  SD). \* $P$  < 0.05 and \*\* $P$  < 0.01.

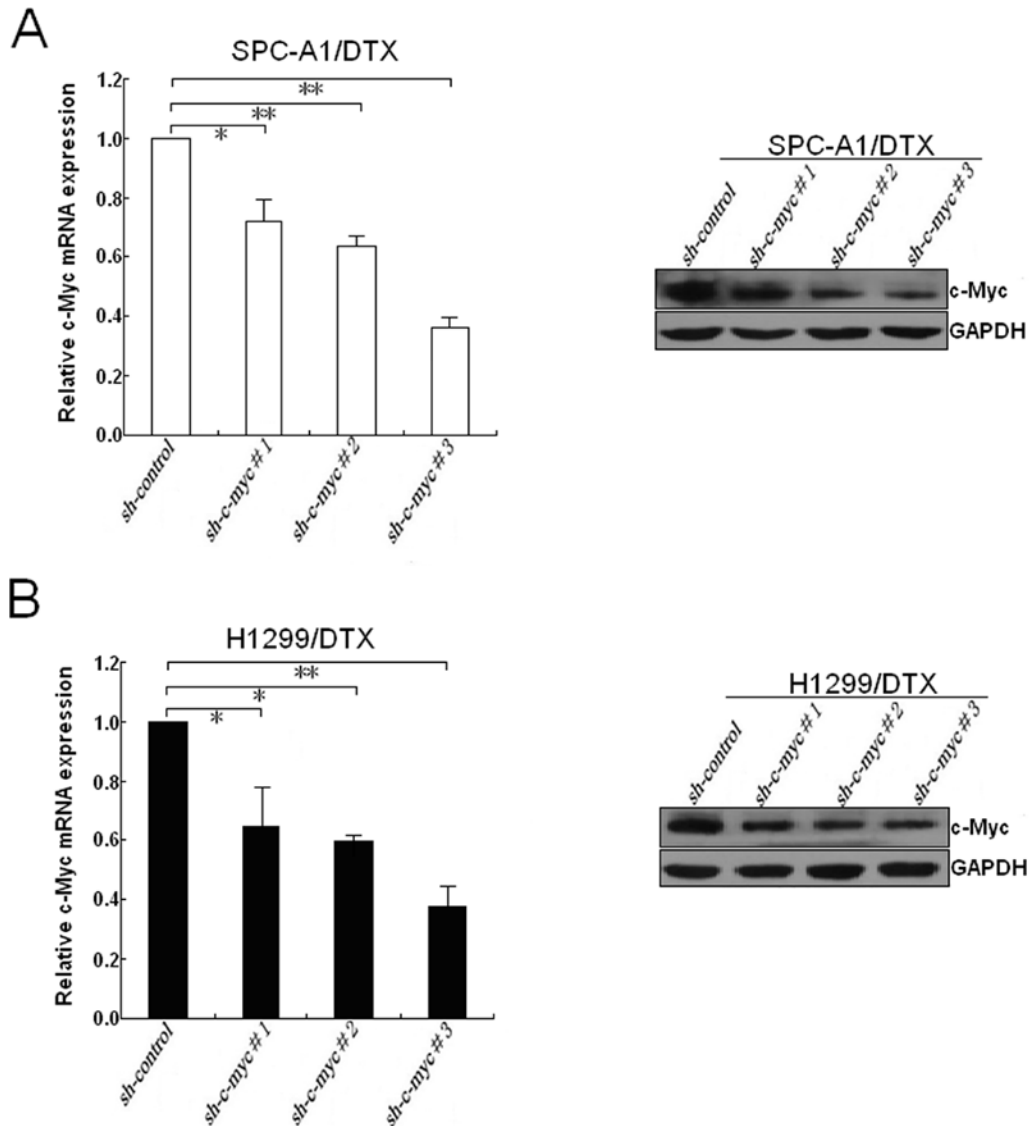

**Supplementary Figure 3: Effect of shRNA targeting c-Myc on c-Myc mRNA and protein expression in docetaxel-resistant LAD cells.** (A) qRT-PCR and Western blotting detection of c-Myc mRNA and protein expression in SPC-A1/DTX stably transfected with sh-control, sh-c-Myc#1, sh-c-Myc#2 or sh-cMy#3 vector, respectively. (B) qRT-PCR and Western blotting detection of c-Myc mRNA and protein expression in H1299/DTX cells stably transfected with sh-control, sh-c-Myc#1, sh-c-Myc#2 or sh-cMy#3 vector, respectively. GAPDH was used as an internal control. Results represent the average of three independent experiments (mean $\pm$ SD). \* $P$  < 0.05 and \*\* $P$  < 0.01.

**A**

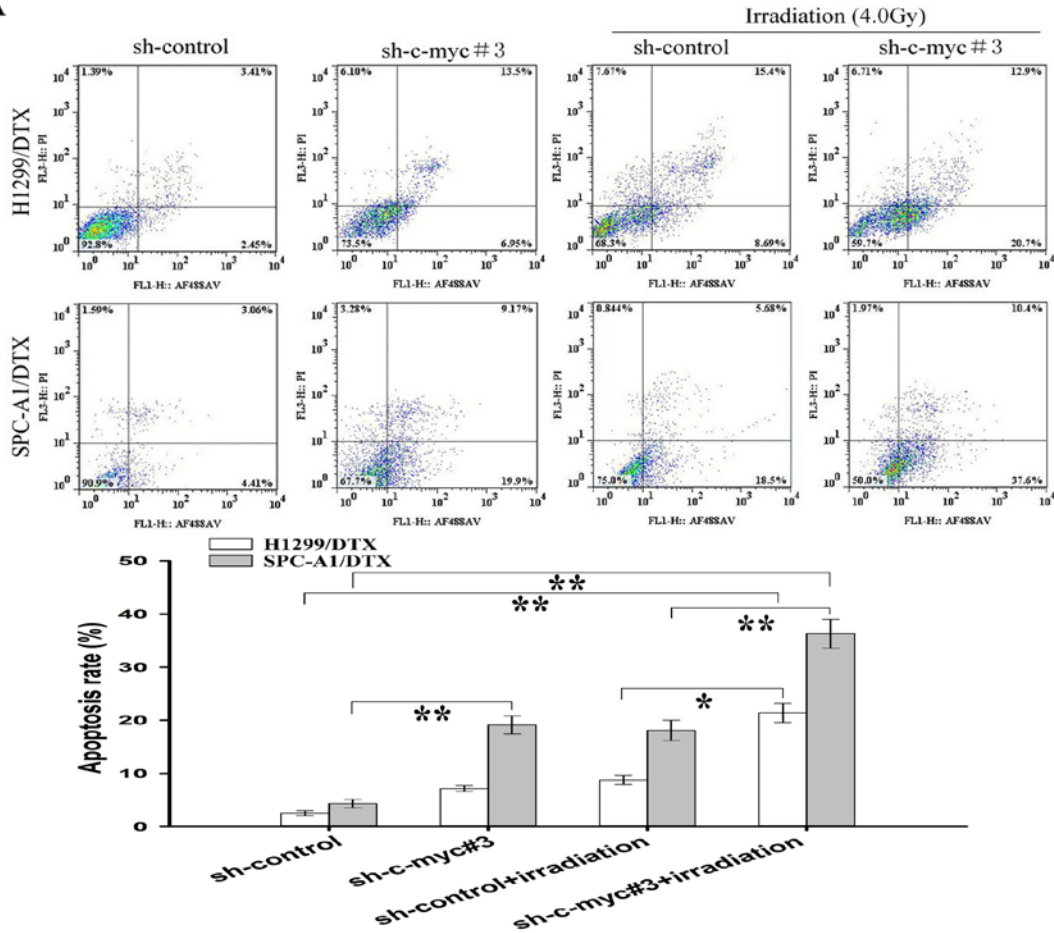

**B**

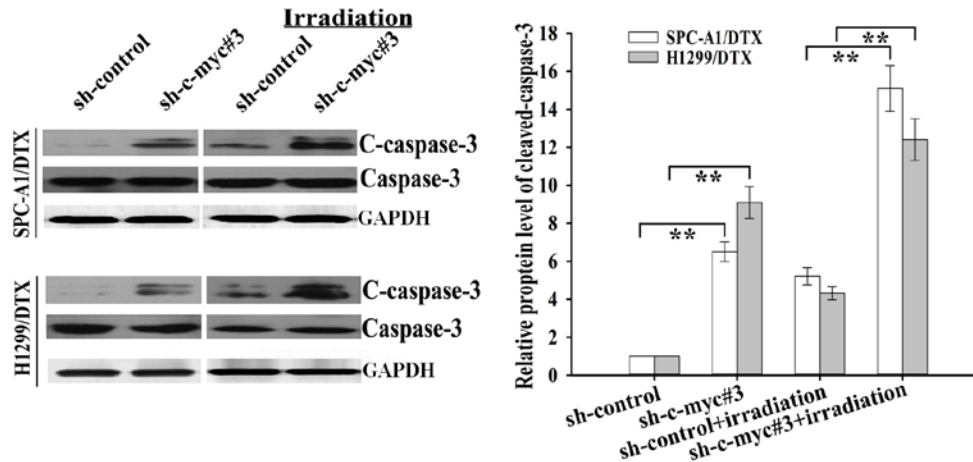

**Supplementary Figure 4: Silencing of c-Myc increases irradiation-induced apoptosis of docetaxel-resistant LAD cells.** (A) Flow cytometric analysis of apoptosis in sh-c-Myc#3 (or sh-control)-transfected H1299/DTX or SPC-A1/DTX cells treated without irradiation or with irradiation (4.0 Gy). (B) Western blotting detection of C-caspase-3 and Caspase-3 protein expression in sh-c-Myc#3 (or sh-control)-transfected H1299/DTX or SPC-A1/DTX cells treated without irradiation or with irradiation (4.0 Gy). GAPDH was used as an internal control. Results represent the average of three independent experiments (mean±SD). \*  $P < 0.05$  and \*\*  $P < 0.01$ .

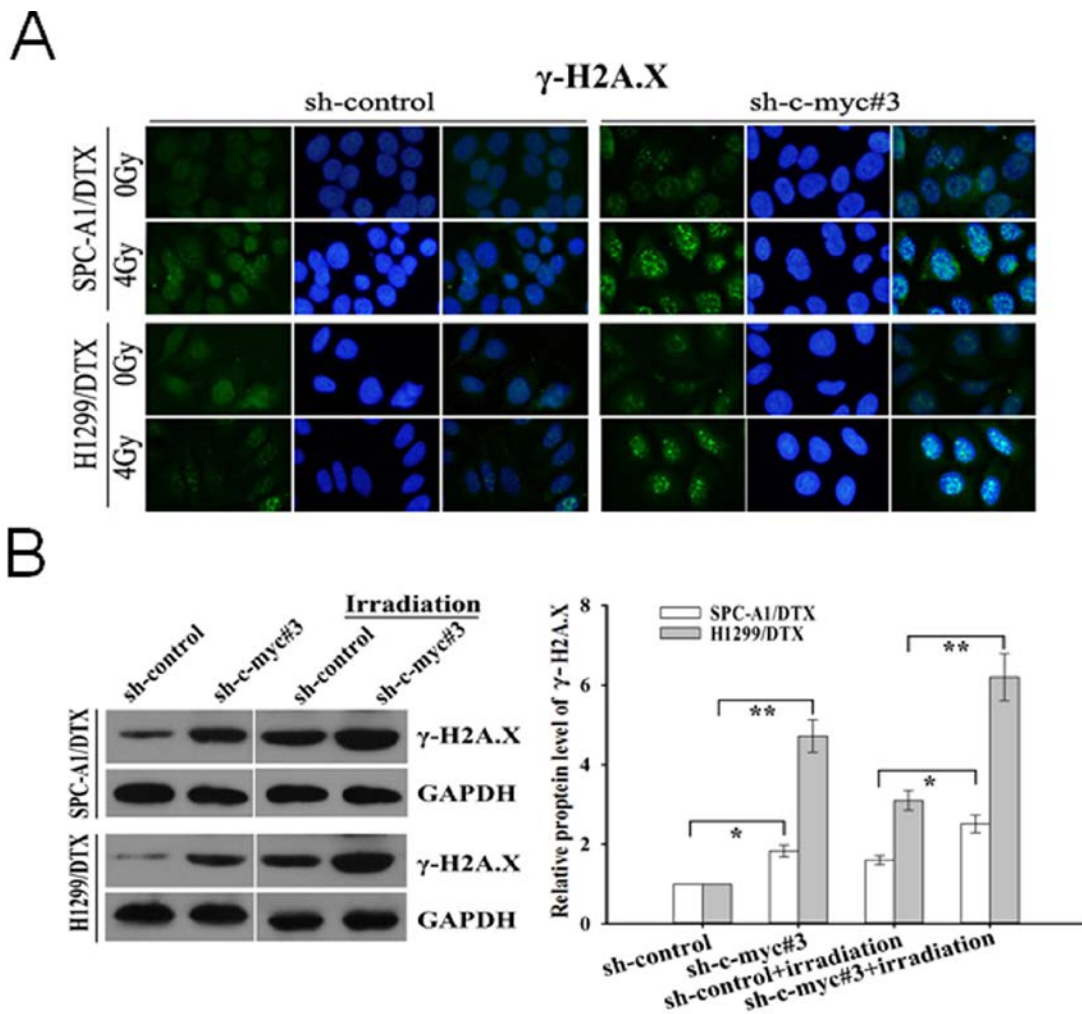

**Supplementary Figure 5: Silencing of c-Myc increases irradiation-mediated DNA double-strand breaks (DSBs) of docetaxel-resistant LAD cells.** (A) Immunofluorescence detection of phosphorylation of H2A.X ( $\gamma$ -H2A.X) foci formation (a marker of DSB) in sh-c-Myc#3 (or sh-control)-transfected SPC-A1/DTX or H1299/DTX treated without irradiation or with irradiation (4.0 Gy). (B) Western blotting detection of  $\gamma$ -H2A.X protein expression in sh-c-Myc#3 (or sh-control)-transfected SPC-A1/DTX or H1299/DTX treated without irradiation or with irradiation (4.0 Gy). GAPDH was used as an internal control. Results represent the average of three independent experiments (mean  $\pm$  SD). \* $P$  < 0.05 and \*\* $P$  < 0.01.

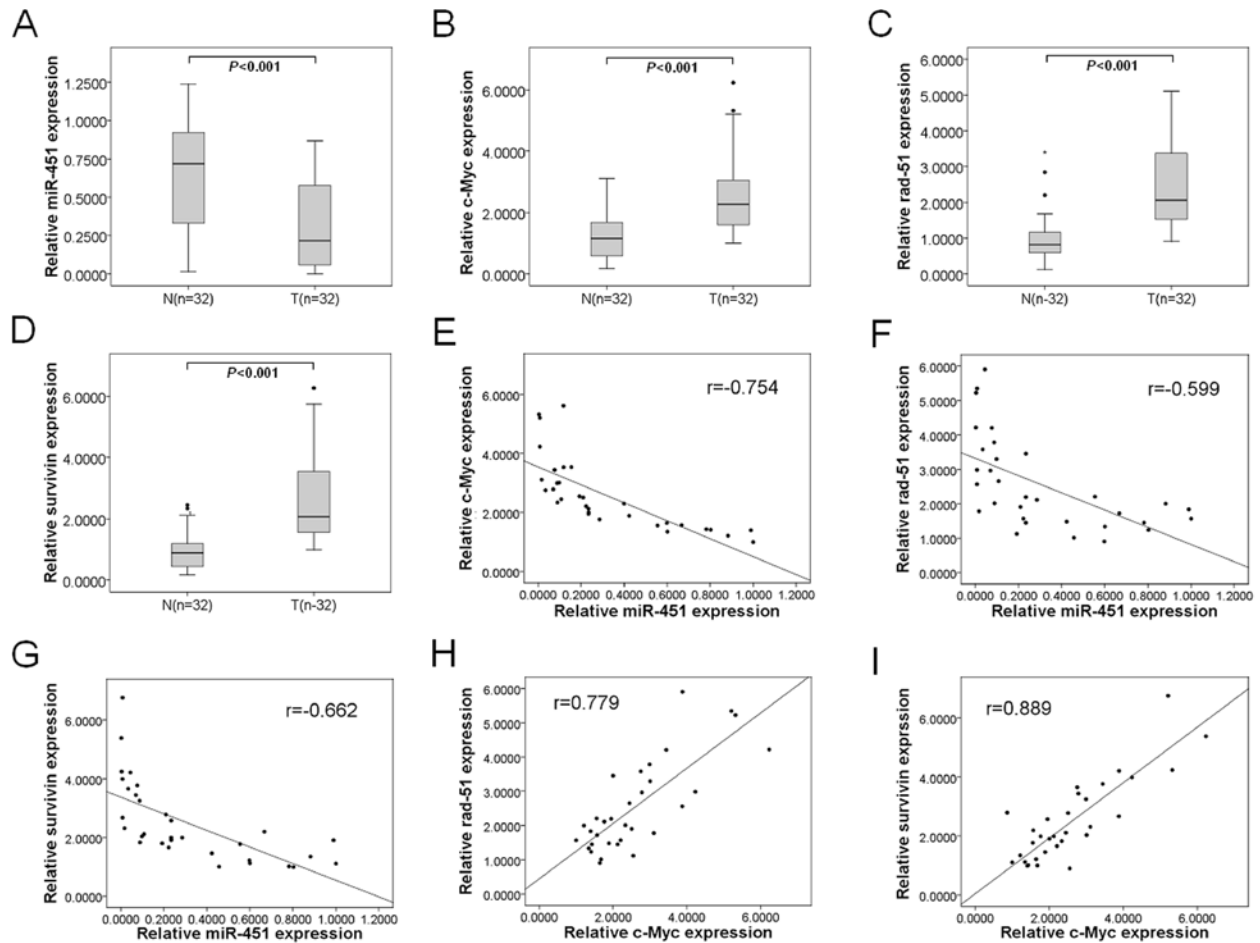

**Supplementary Figure 6: Expression of miR-451, c-Myc, rad-51 and survivin mRNA in LAD tissues.** (A) qRT-PCR detection of relative miR-451 expression in LAD tissues (n=32) and corresponding nontumor tissues (n=32;  $P < 0.001$ ). U6 was used as an internal control. (B) qRT-PCR detection of relative c-Myc mRNA expression in LAD tissues (n=32) and corresponding nontumor tissues (n=32;  $P < 0.001$ ). (C) qRT-PCR detection of relative rad-51 mRNA expression in LAD tissues (n=32) and corresponding nontumor tissues (n=32;  $P < 0.001$ ). (D) qRT-PCR detection of relative survivin mRNA expression in LAD tissues (n=32) and corresponding nontumor tissues (n=32;  $P < 0.001$ ). (E) A statistically significant inverse correlation between miR-451 and c-Myc mRNA expression levels in 32 cases of LAD tissues (Spearman's correlation analysis,  $r = -0.754$ ;  $P < 0.0001$ ). (F) A statistically significant inverse correlation between miR-451 and rad-51 mRNA expression levels in 32 cases of LAD tissues (Spearman's correlation analysis,  $r = -0.599$ ;  $P < 0.01$ ). (G) A statistically significant inverse correlation between miR-451 and survivin mRNA expression levels in 32 cases of LAD tissues (Spearman's correlation analysis,  $r = -0.599$ ;  $P < 0.001$ ). (H) A statistically significant positive correlation between c-Myc and rad-51 mRNA expression levels in 32 cases of LAD tissues (Spearman's correlation analysis,  $r = 0.779$ ;  $P < 0.001$ ). (I) A statistically significant positive correlation between c-Myc and survivin mRNA expression levels in 32 cases of LAD tissues (Spearman's correlation analysis,  $r = 0.889$ ;  $P < 0.001$ ). Results represent the average of three independent experiments (mean $\pm$ SD). Corresponding  $P$  values analyzed by Spearman correlation test are indicated.

**Supplementary Table 1: Primers for qRT-PCR assay**

---

| Name            | Primes                                                                           |
|-----------------|----------------------------------------------------------------------------------|
| <b>miR-451</b>  | <b>F:5'-ACACTCCAGCTGGGAAACCGTTACCATTA -3'</b><br><b>R:5'-TGGTGTCGTGGAGTCG-3'</b> |
| <b>U6</b>       | <b>F:5'-CTCGCTTCGGCAGCACA-3'</b><br><b>R:5'-AACGCTTCACGAATTTGCGT-3'</b>          |
| <b>c-Myc</b>    | <b>F:5'-GGAGGCTATTCTGCCCATTT-3'</b><br><b>R:5'-CGAGGTCATAGTTCCTGTTGGT-3'</b>     |
| <b>Rad-51</b>   | <b>F:5'-CGCCCTTACAGAACAGACTACT-3'</b><br><b>R:5'-AAACATCGCTGCTCCATCC-3'</b>      |
| <b>Survivin</b> | <b>F:5'-CGAGGCTGGCTTCATCCA-3'</b><br><b>R:5'-GCAACCGGACGAATGCTTT-3'</b>          |
| <b>GAPDH</b>    | <b>F:5'-TGGGTGTGAACCATGAGAAGT-3'</b><br><b>R:5'-TGAGTCCTTCCACGATACCAA-3'</b>     |

---

**Supplementary Table 2: The sequences of shRNAs and primers**

---

| Name                          | Primes                                                                                                                                                     |
|-------------------------------|------------------------------------------------------------------------------------------------------------------------------------------------------------|
| <b>sh-control</b>             | <b>F 5'-CCGGGCTTCTCCGAACGTGTCACGTCTCGAGAAGAAACCAGTAAACGTAAGCTTTTTG -3'</b><br><b>R 5'- AATTCAAAAAGCTTCTCCGAACGTGTCACGTCTCGAGAAGAAACCAGTAAACGTAAGC -3'</b>  |
| <b>sh-c-myc #1</b>            | <b>F 5'- CCGGCCAAGGTAGTTATCCTTAAACTCGAGTTTAAGGATAACTACCTTGggTTTTTG-3'</b><br><b>R5'- AATTCAAAAACCCAAGGTAGTTATCCTTAAACTCGAGTTTAAGGATAACTACCTTGGG-3'</b>     |
| <b>sh-c-myc #2</b>            | <b>F 5'- CCGGCAGTTGAAACACAAACTTGAACCTCGAGTTCAAGTTTGTGTTTCAACtgTTTTTG-3'</b><br><b>R 5'- AATTCAAAAACAGTTGAAACACAAACTTGAACCTCGAGTTCAAGTTTGTGTTTCAACTG-3'</b> |
| <b>sh-c-myc #3</b>            | <b>F 5'- CCGGCAGGAAGTATGACCTCGACTACTCGAGTAGTCGAGGTCATAGTTCtgTTTTTG-3'</b><br><b>R 5'- AATTCAAAAACAGGAAGTATGACCTCGACTACTCGAGTAGTCGAGGTCATAGTTCCTG-3'</b>    |
| <b>pGL3/c-myc/3'-UTR-wt,</b>  | <b>F:5'-CATCTAGAGGAAAAGTAAGGAAAACGATTCCTTCT-3',</b><br><b>R:5'-GCTCTAGATATTAAGTTATTTACATTTAATGGCA-3'</b>                                                   |
| <b>pGL3/c-myc/3'-UTR-mut,</b> | <b>F:5'-CATCTAGAGGAAAAGTAAGGAATCGCCGGCCTTCTAACA-3'</b><br><b>R:5'-GCTCTAGATATTAAGTTATTTACATTTAATGGCA-3'</b>                                                |

---



**Supplementary Table 3: Primers for CHIP assay**

| Name            | Primes                                                                     |
|-----------------|----------------------------------------------------------------------------|
| <b>Rad-51</b>   | <b>F:5'-AGAGATGGGGTTTTGCCATC-3'</b><br><b>R:5'-GTGGCTCAAGCCTGTAATCC-3'</b> |
| <b>Survivin</b> | <b>F:5'-CTGCACGCGTTCTTTGA-3'</b><br><b>R:5'-GCGGTGGTCCTTGAG A-3'</b>       |

**Supplementary Table 4: Clinicopathological factors of patients**

| Variables             | Number (%) |
|-----------------------|------------|
| Gender                |            |
| Female                | 22 (68.8)  |
| Male                  | 10 (31.2)  |
| Smoking condition     |            |
| Smoker                | 26 (81.2)  |
| Non-smoker            | 6 (18.8)   |
| Age (years)           |            |
| <65                   | 18 (56.3)  |
| ≥65                   | 14 (43.7)  |
| Tumor differentiation |            |
| Well+Moderate         | 11 (34.3)  |
| Poor                  | 21 (65.7)  |
| Clinical stage        |            |
| IIIB                  | 19 (59.4)  |
| IV                    | 13 (40.6)  |
| Tumor response        |            |
| CR+PR                 | 8 (25.0)   |
| SD+PD                 | 24 (75.0)  |
